# Supplementary material for: Buffering the local pH via single-atomic Mn–N auxiliary sites to boost CO2 electroreduction
Source: Royal Society of Chemistry journal article supplement (doi:10.1039/d2sc04776d), 2022-01-01
Supplement: d2sc04776d1.pdf [file d2sc04776d1.pdf]

## Supporting information for

### **Buffering the local pH via single-atomic Mn-N auxiliary sites to boost CO<sub>2</sub> electroreduction**

Yan Yang,<sup>abc</sup> Tang Tang,<sup>a</sup> Zhen-Hua Lyu,<sup>ac</sup> Li-Rong Zheng,<sup>c</sup> Qing-Hua Zhang,<sup>d</sup> Jiaju Fu,<sup>\*a</sup> and Jin-Song Hu<sup>\*acf</sup>

- a. Beijing National Laboratory for Molecular Sciences (BNLMS), CAS Key Laboratory of Molecular Nanostructure and Nanotechnology, Institute of Chemistry, Chinese Academy of Sciences, Beijing 100190, China. E-mail: [fujiaju@iccas.ac.cn](mailto:fujiaju@iccas.ac.cn); [hujs@iccas.ac.cn](mailto:hujs@iccas.ac.cn)
- b. Zhejiang Tiandi Environmental Protection Technology Co., Ltd, Hangzhou 310003, China.
- c. Institute of High Energy Physics, Chinese Academy of Sciences, Beijing 100049, China.
- d. Institute of Physics, Chinese Academy of Sciences, Beijing 100190, China.
- e. University of Chinese Academy of Sciences, Beijing 100049, China.
- f. Dalian National Laboratory for Clean Energy, Dalian 116023, China.

# Table of Contents

## Experimental procedures

- I. Synthesis
- II. Characterizations
- III. Electrochemical measurements
- IV. The preparation of working electrodes
- V. Local pH Characterization

## Supporting Figures

**Figure S1.** The TEM, HRTEM, HAADF-STEM and corresponding EDS images and of Ni-N-C.

**Figure S2.** The TEM, HRTEM, HAADF-STEM and corresponding EDS images and of Mn-N-C.

**Figure S3.** The survey XPS spectra of Ni/Mn-N-C.

**Figure S4.** The survey and Ni 2p XPS spectra of Ni-N-C.

**Figure S5.** The survey and Mn 2p XPS spectra of Mn-N-C.

**Figure S6.** The N 1s XPS spectra of Ni-N-C and Mn-N-C.

**Figure S7.** The Ni K edge XANES and EXAFS spectra of Ni-N-C.

**Figure S8.** The Mn K edge XANES and EXAFS spectra of Mn-N-C.

**Figure S9.** Potential-dependent FEs for H<sub>2</sub> of Ni/Mn-N-C, Ni-N-C, and Mn-N-C.

**Figure S10.** Characterization for the liquid product of Ni/Mn-N-C after 3 h CO<sub>2</sub> reduction at -0.76V process by nuclear magnetic resonance spectroscopy.

**Figure S11.** Characterization for the liquid product of Ni-N-C after 3 h CO<sub>2</sub> reduction at -0.76V process by nuclear magnetic resonance spectroscopy.

**Figure S12.** Characterization for the liquid product of Mn-N-C after 3 h CO<sub>2</sub> reduction at -0.76V process by nuclear magnetic resonance spectroscopy.

**Figure S13.** The ECR catalytic activity of metal-free N-doped carbon support.

**Figure S14.** The XRD pattern, TEM image and HRTEM image of Ni/Mn-N-C after CO<sub>2</sub>RR stability test.

**Figure S15.** Cyclic voltammetry curves and Double-layer capacitance ( $C_{dl}$ ) of different catalysts.

**Figure S16.** Tafel plots of the as-prepared samples.

## Supporting Table

**Table S1.** Elemental contents calculated from ICP-AES results.

**Table S2.** Comparison of other Ni SACs for the electrochemical conversion of CO<sub>2</sub> to CO.

## Experimental procedures

### I. Synthesis

**Materials:** Potassium citrate monohydrate ( $K_3C_6H_5O_7 \cdot H_2O$ , 99+%, Alfa Aesar Co., Ltd.), nickel nitrate hexahydrate ( $Ni(NO_3)_2 \cdot 6H_2O$ , 99%, Alfa Aesar Co., Ltd.), manganese nitrate hexahydrate ( $Mn(NO_3)_2 \cdot 6H_2O$ , 99%, Alfa Aesar Co., Ltd.),  $\alpha$ -D-glucose ( $C_6H_{12}O_6$ , 99%, Alfa Aesar Co., Ltd.), melamine ( $C_3H_6N_6$ , 99%, Alfa Aesar Co., Ltd.), potassium bicarbonate ( $KHCO_3$ , 99.7-100.5%, Alfa Aesar Co., Ltd.), sulfuric acid ( $H_2SO_4$ , 95-98%, Sinopharm Chemical Reagent Co. Ltd).

**Preparation of porous carbon (PC):** 2.5 g  $K_3C_6H_5O_7 \cdot H_2O$  was pyrolyzed at 800°C for one hour under Ar atmosphere to obtain a black product (heating rate 3°C /min), followed by post-processing with 0.5 M  $H_2SO_4$  solution and deionized water to remove inorganic impurities until the pH was close to 7. Then obtained powder went through a wet ball milling at 500 rpm for 4 h with isopropanol as solvent. The precipitates were collected by centrifugation and drying at 60°C.

**Preparation of Ni/Mn-N-C:** Typically, 0.75 mmol of  $Ni(NO_3)_2 \cdot 6H_2O$  and 0.75 mmol of  $Mn(NO_3)_2 \cdot 6H_2O$  were first dissolved in 5 mL of deionized water. Then, 1.2 g of  $\alpha$ -D-glucose and 60 mg of ball-milled porous carbon were added to the above solution and sonicated for 30min, followed by a 12 h store. The precipitates were then separated by centrifugation at 6000 rpm for 3 min, drying at 60°C overnight, and then grounded by melamine with a mass ratio of 1:5. The obtained powder went through pyrolysis at 800 °C for two hours under the Ar atmosphere.

**Preparation of Ni-N-C:** Typically, 1.50 mmol of  $Ni(NO_3)_2 \cdot 6H_2O$  was first dissolved in 5 mL of deionized water. Then, 1.2 g of  $\alpha$ -D-glucose and 60 mg of ball-milled porous carbon were added to the above solution and sonicated for 30min, followed by a 12 h store. The precipitates were then separated by centrifugation at 6000 rpm for 3 min, drying at 60°C overnight, and then grounded by melamine with a mass ratio of 1:5. The obtained powder went through pyrolysis at 800 °C for two hours under the Ar atmosphere.

**Preparation of Mn-N-C:** Typically, 1.50 mmol of  $Mn(NO_3)_2 \cdot 6H_2O$  was first dissolved in 5 mL of deionized water. Then, 1.2 g of  $\alpha$ -D-glucose and 60 mg of ball-milled porous carbon were added to the above solution and sonicated for 30min, followed by a 12 h store. The precipitates were then separated by centrifugation at 6000 rpm for 3 min, drying at 60°C overnight, and then grounded by melamine with a mass ratio of 1:5. The obtained powder went through pyrolysis at 800 °C for two

hours under the Ar atmosphere.

## II. Characterizations

The Powder X-ray diffraction (XRD) pattern was performed on a Rigaku D/Max-2500 diffractometer using a Cu K $\alpha$ 1 radiation ( $\lambda = 1.54 \text{ \AA}$ ). Scanning electron microscopic images (SEM) were obtained on a Hitachi scanning electron microscope (S-4800, Japan). Transmission electron microscopic (TEM) images were collected by the JEM-2100F microscope (JEOL, Tokyo, Japan) equipped with an EDS detector (Oxford Instrument, UK), working at an acceleration voltage of 200 kV. STEM images were attained on a JEOL ARM200F (JEOL, Tokyo, Japan) STEM under 200 kV with a cold field-emission gun and double hexapole Cs correctors (CEOS GmbH, Heidelberg, Germany). Electron energy loss spectroscopy (EELS) data were obtained with a multi-scan charge-coupled device (CCD) camera (Gatan Quantum Model 965, Gatan Inc.). X-ray photoelectron spectroscopy (XPS) analysis was performed on an ESCALab220i-XL electron spectrometer (VG Scientific, UK) using a monochromatic Al K $\alpha$  radiation as the X-ray source. The X-ray absorption spectroscopy (XAS) of Cu K-edge was obtained on the XAFS station of the 3W1 beamline of the Beijing Synchrotron Radiation Facility (BSRF) using a Si (111) double crystal monochromator.

## III. Electrochemical measurements

Electrochemical CO<sub>2</sub>RR measurements were performed at ambient pressure and room temperature using a standard three-electrode system configured with an H-type electrolytic cell, in which an electrode prepared from a catalyst, an Ag/AgCl electrode, and a graphite rod were used as the working electrode, reference electrode, and counter electrode, respectively. 15 mL of 0.5 M KHCO<sub>3</sub> solution (pH=7.2) was added to the anode compartment and the cathode compartment, respectively, and the gas space was 10 mL, which was separated by a Nafion-117 proton exchange membrane. Before measurement, the cathode compartment was pre-saturated by purging with high purity CO<sub>2</sub>/Ar for at least 30 min. During the measurement, the flow rate of CO<sub>2</sub> blown into the electrolyte was fixed at 10 mL min<sup>-1</sup>. Linear sweep voltammetry was performed in CO<sub>2</sub>/Ar-saturated 0.5 M KHCO<sub>3</sub> aqueous solution with a potential range of 0.20 V to -1.20 V and a scan rate of 5 mV s<sup>-1</sup>. The  $C_{dl}$  values were determined from the cyclic voltammograms (CVs) of the electric double layer region at different scan rates. The potential sweep range of the CV curve was from 0.20 V to 0.40 V, and the sweep speed ranged from 10 mV s<sup>-1</sup> to 60 mV s<sup>-1</sup>.

All potentials mentioned in this work were converted to the values vs. reversible hydrogen electrode (RHE) followed by the Nernst equation (1):

$$E \text{ (vs RHE)} = E \text{ (vs Ag/AgCl)} + 0.198 + 0.059 \times \text{pH}.$$

The Faradaic efficiency (FE) of the specific products was calculated by the following equation (2):

$$\text{FE}_i = \frac{Q_i}{Q_{\text{total}}} = z \times n_i \times F / Q_{\text{total}}$$

$i$ : the specific products including CO, H<sub>2</sub>;

$Q_i$ : the partial charge used for the generation of specific products, C;

$Q_{\text{total}}$ : the total charge passed, C;

$z$ : the number of transferred electrons for CO<sub>2</sub>-to-CO conversion and H<sub>2</sub>O-H<sub>2</sub> reduction, which is two for CO and H<sub>2</sub>;

$n_i$ : the number of moles for specific products;

$F$ : Faradaic constant, which is 96,485 C mol<sup>-1</sup>;

All current densities (mA cm<sup>-2</sup>) mentioned in this article were normalized to the electrode geometrical area.

Gas chromatography (GC, Agilent Technologies 7890B) was employed to detect gaseous products generated from the cathode compartment. <sup>1</sup>H Nuclear magnetic resonance (NMR, Bruker AVANCE 600) was employed to analyze the liquid products containing the mixture of 500 μL electrolyte after electrocatalysis, 100 μL of D<sub>2</sub>O, and 100 μL of 7.0 mM of dimethyl sulphoxide solution (DMSO, internal standard).

#### **IV. The preparation of working electrodes**

Typically, the mixed solution contains 2 mg of catalyst powder, 760 μL of ethanol, and 40 μL of 0.5 wt.% Nafion solution was sonicated for 30 min to form a uniform catalyst ink. The catalyst ink (400 μL) was then uniformly dropped onto the carbon paper (CP), giving a catalyst loading of 1.0 mg cm<sup>-2</sup>. The working electrode was naturally dried for the following electrochemical test.

#### **V. Local pH Characterization**

The catalyst ink solution containing 2 mg of catalyst powder and 500 μL of ethanol was sonicated for 30 min to form a uniform catalyst ink. The catalyst ink (12 μL) and 0.5 wt.% Nafion solution (5

$\mu\text{L}$ ) were then uniformly dropped onto the surface of disk electrodes successively. The disk electrode was naturally dried for the following electrochemical test.

The electrochemical test was performed in a standard three-electrode cell using a rotating ring disk electrode assembly equipped with a bipotentiostat (CHI 760E). Ag/AgCl electrodes and graphite rods were used as reference and counter electrodes, respectively. 25 mL of 0.5 M  $\text{KHCO}_3$  solution was added to the electrolytic cell, and it was pre-saturated by purging with high-purity  $\text{CO}_2$  for at least 30 minutes before measurement. During the test,  $\text{CO}_2$  gas was continuously passed into the electrolyte to ensure that the pH was stable at 7.2. The rotating ring disk electrode (RRDE) assembly consisted of the as-prepared catalyst disks (Ni/Mn-N-C, Ni-N-C, and Mn-N-C) and Pt ring electrodes. Under rotating conditions (1600 rpm), a specific negative potential (ranging from -0.56 V to -0.96 V) was applied to the catalyst disc to catalyze  $\text{CO}_2\text{RR}$  to CO, while the Pt ring electrode was subjected to a CV cycle between 0 and 1.2 V at a scan rate of  $100\text{ mV}^{-1}$ .

## Supporting Figures

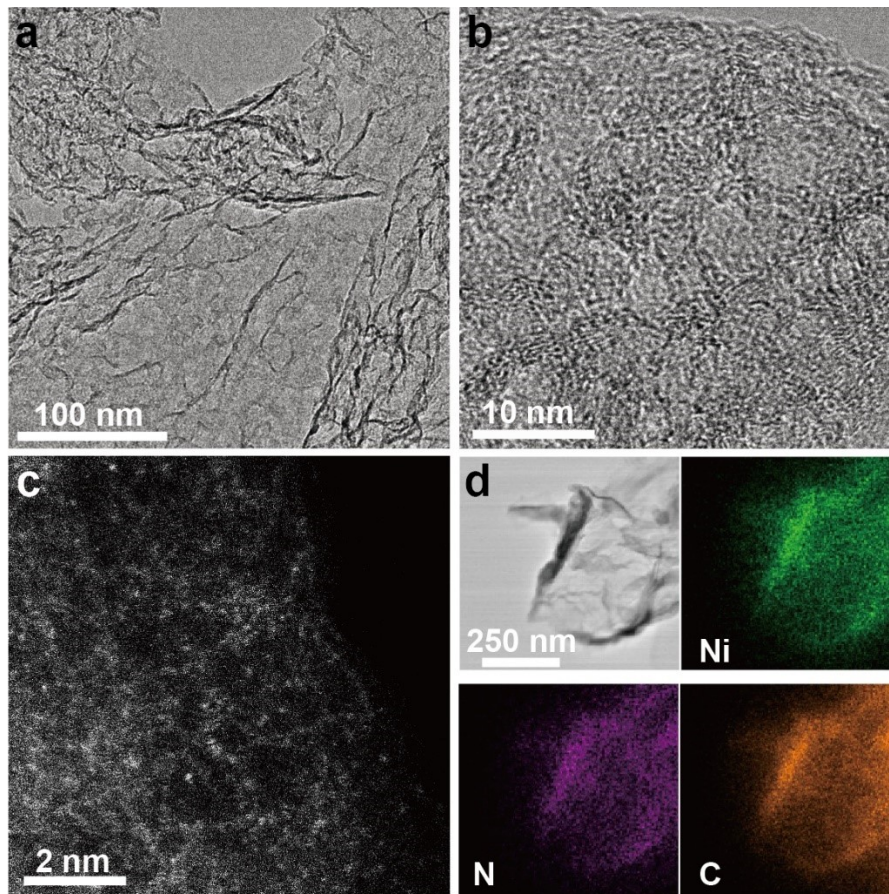

**Figure S1.** a) TEM image of Ni-N-C, b) HRTEM image of Ni-N-C, c) HAADF-STEM image of Ni-N-C, d) TEM image and corresponding elemental mapping images of Ni-N-C.



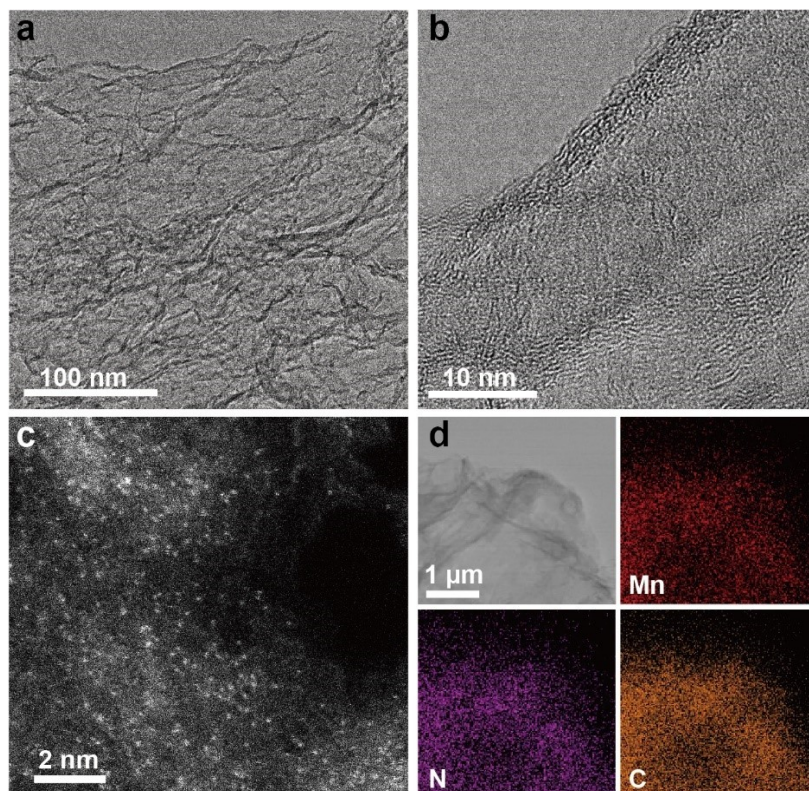

**Figure S2.** a) TEM image of Mn-N-C, b) HRTEM image of Mn-N-C, c) HAADF-STEM image of Mn-N-C, d) TEM image and corresponding elemental mapping images of Mn-N-C.

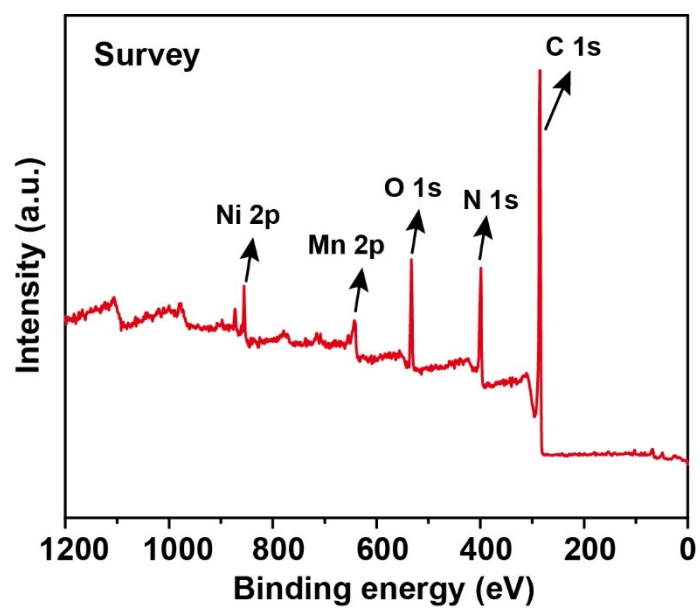

**Figure S3.** The survey XPS spectra of Ni/Mn-N-C.

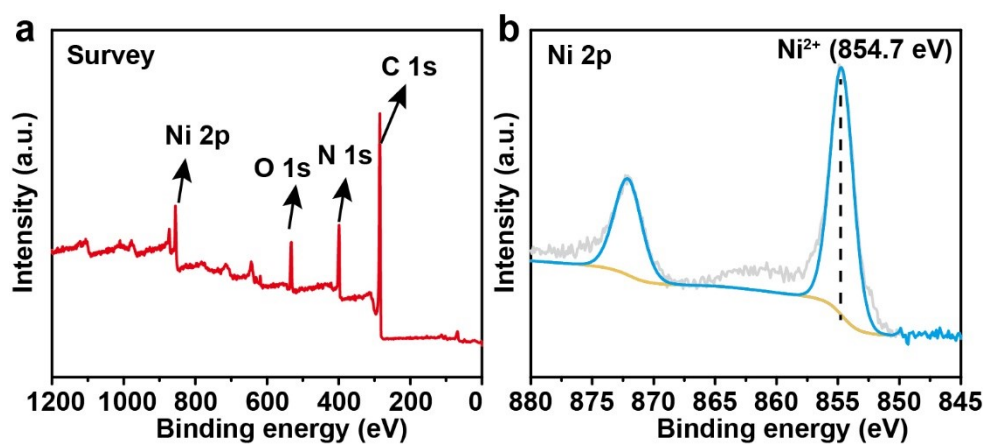

**Figure S4.** a) The survey XPS spectra of Ni-N-C, b) The Ni 2p XPS spectra of Ni-N-C.

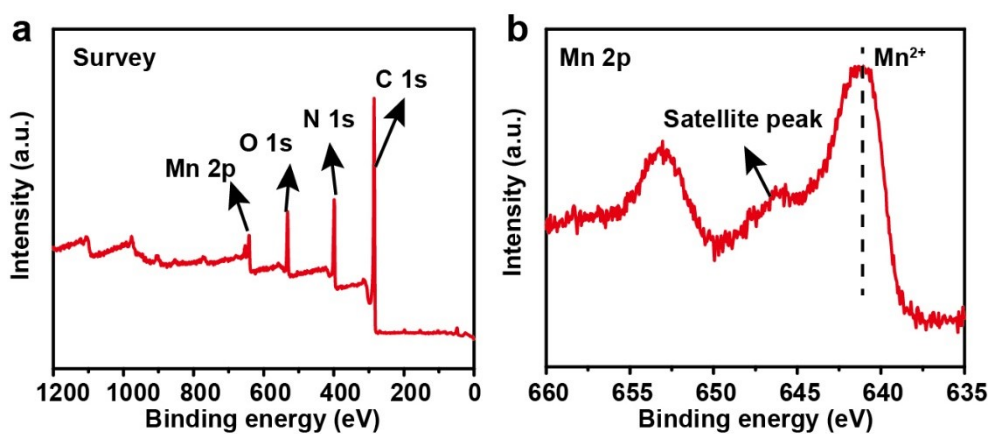

**Figure S5.** a) The survey XPS spectra of Mn-N-C, b) The Mn 2p XPS spectra of Mn-N-C.

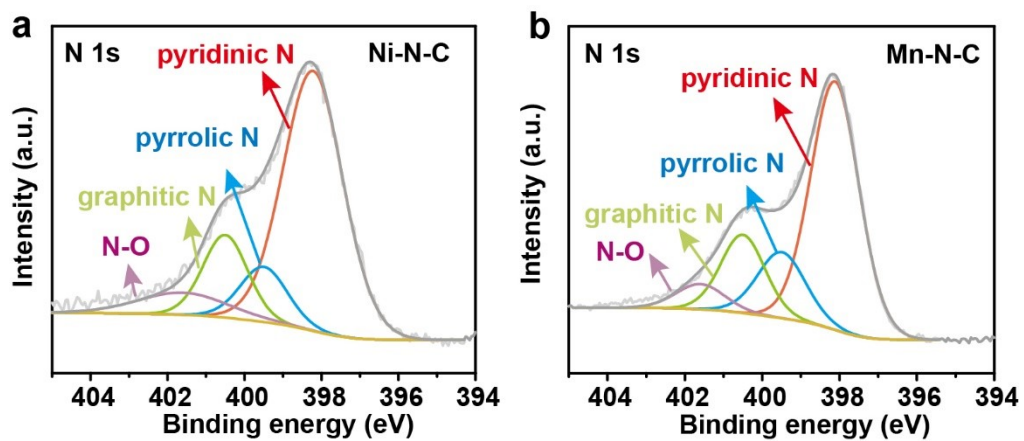

**Figure S6.** a) The high-resolution N 1s XPS spectra of Ni-N-C, b) The high-resolution N 1s XPS spectra of Mn-N-C.

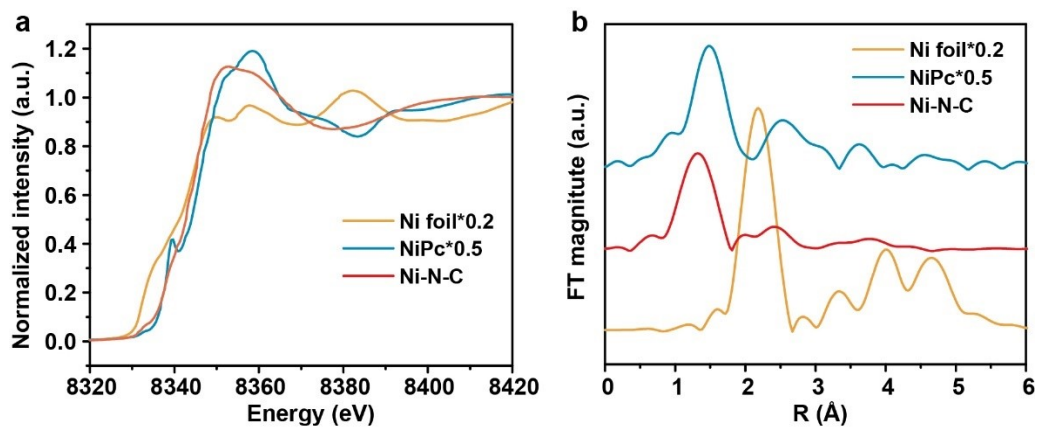

**Figure S7.** a) Ni K edge XANES spectra of Ni-N-C, b) Ni K edge EXAFS spectra of Ni-N-C.

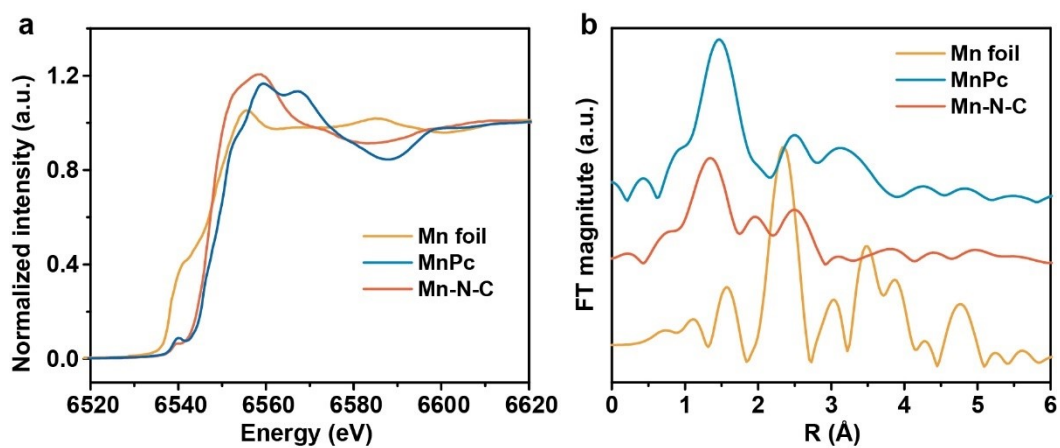

**Figure S8.** a) Mn K edge XANES spectra of Mn-N-C, b) Mn K edge EXAFS spectra of Mn-N-C.

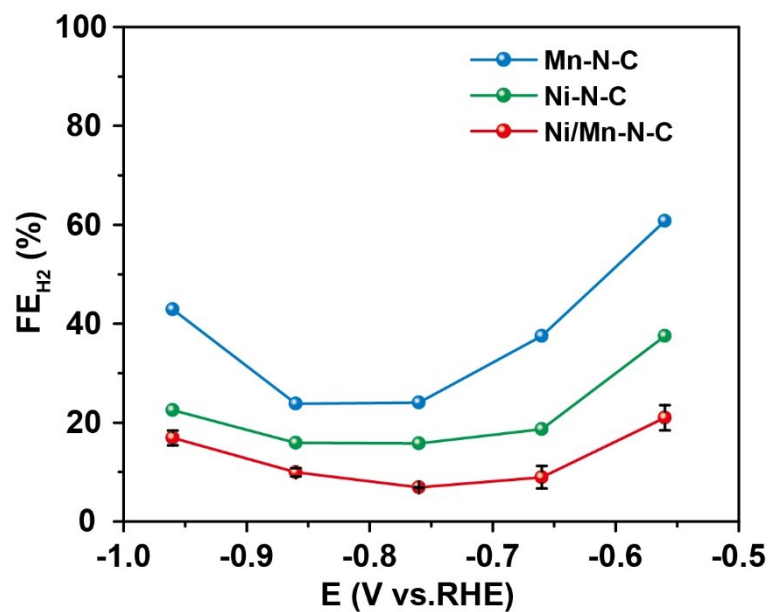

**Figure S9.** Potential-dependent FEs for H<sub>2</sub> of Ni/Mn-N-C, Ni-N-C, and Mn-N-C.

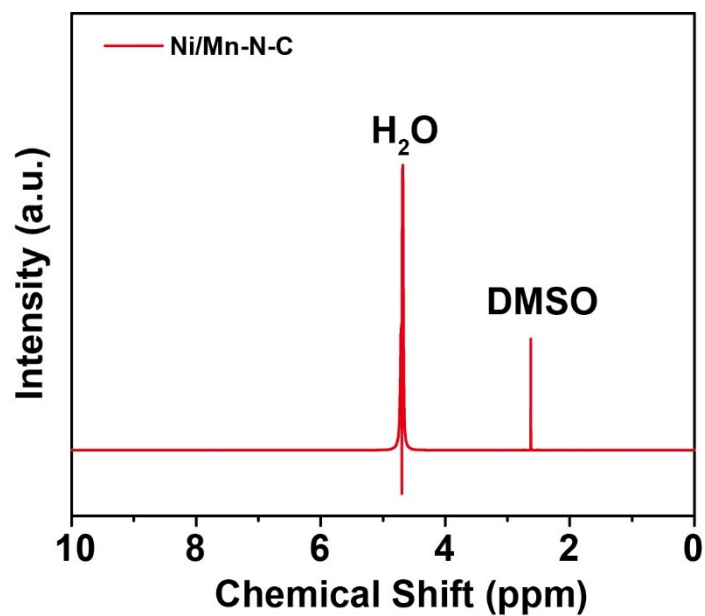

**Figure S10.** Characterization for the liquid product of Ni/Mn-N-C after 3 h CO<sub>2</sub> reduction at -0.76V process by nuclear magnetic resonance spectroscopy.

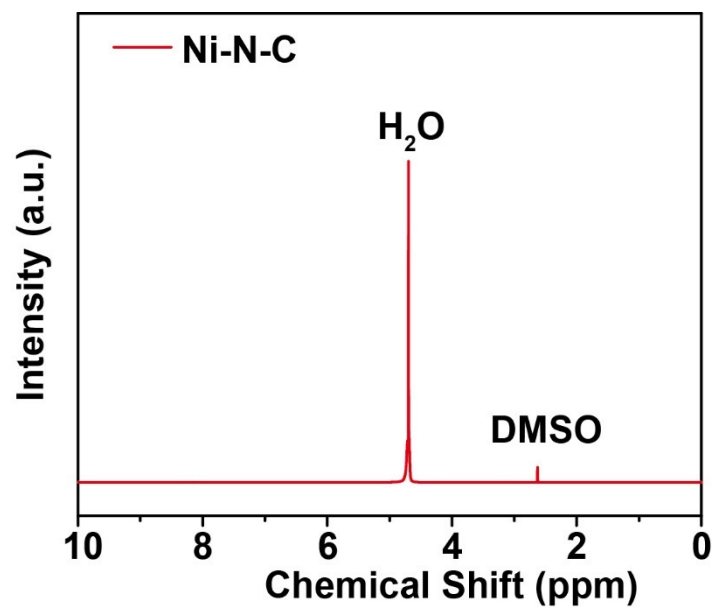

**Figure S11.** Characterization for the liquid product of Ni-N-C after 3 h CO<sub>2</sub> reduction at -0.76V process by nuclear magnetic resonance spectroscopy.

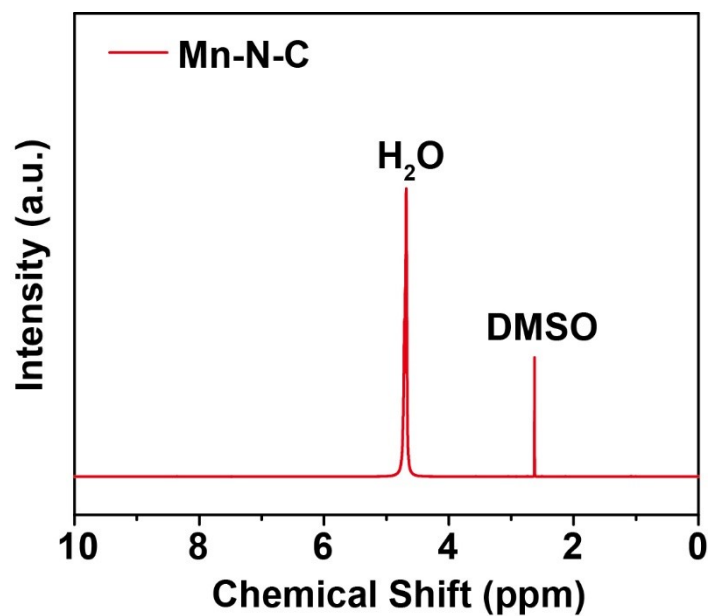

**Figure S12.** Characterization for the liquid product of Mn-N-C after 3 h CO<sub>2</sub> reduction at -0.76V process by nuclear magnetic resonance spectroscopy.

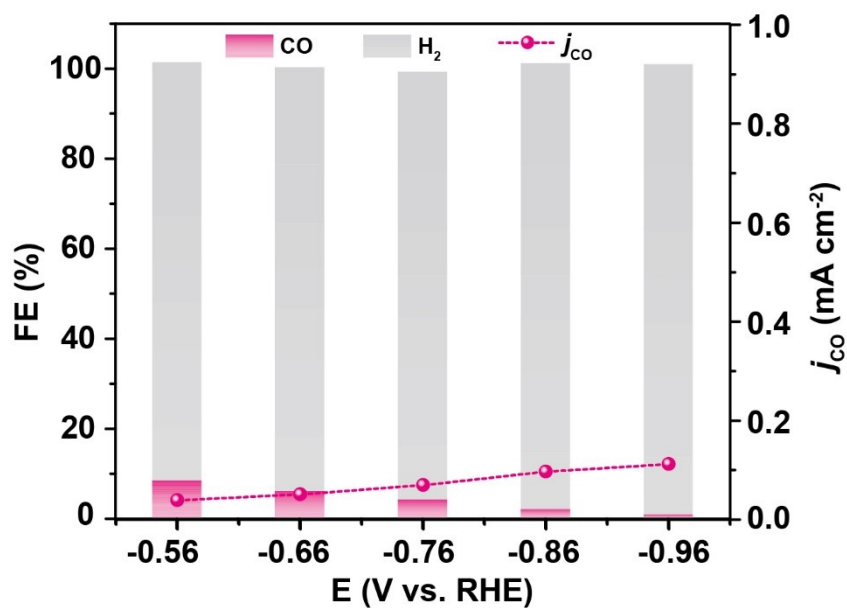

**Figure S13.** The ECR catalytic activity of metal-free N-doped carbon support.

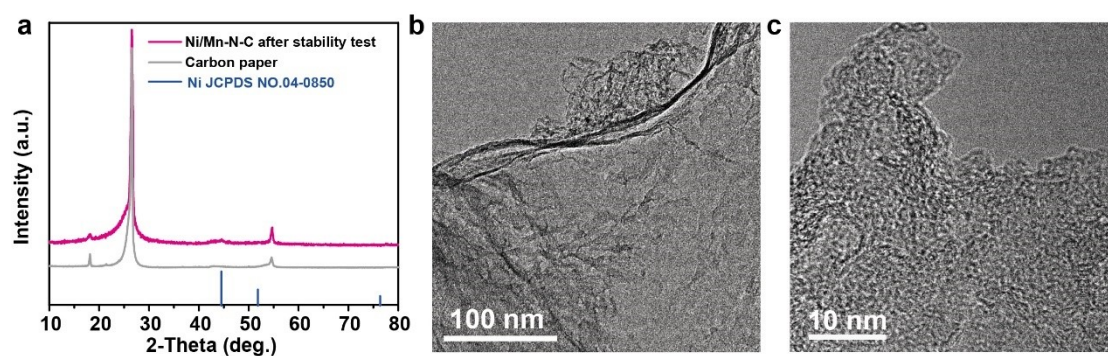

**Figure S14.** a) XRD pattern, b) TEM image and c) HRTEM image of Ni/Mn-N-C after CO<sub>2</sub>RR stability test.



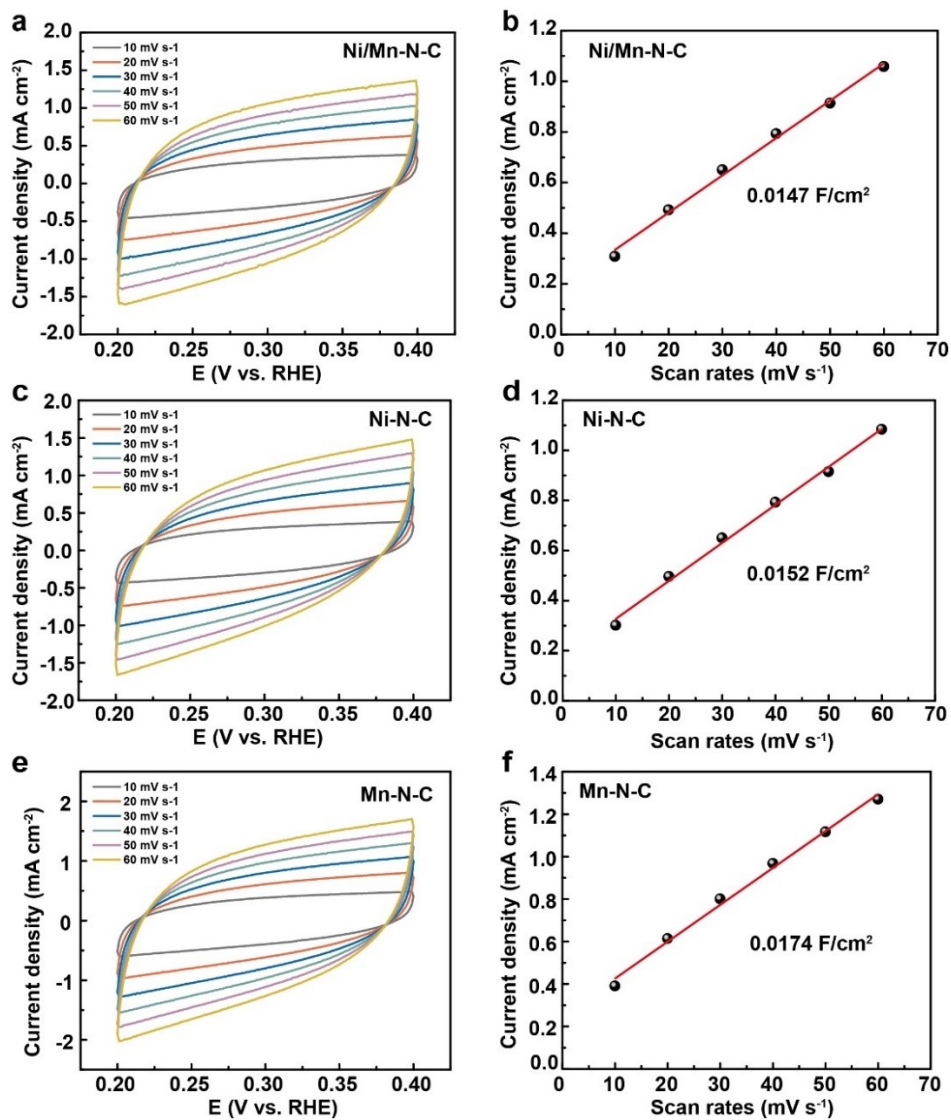

**Figure S15.** a) Cyclic voltammograms of the Ni/Mn-N-C catalyst at different scan rates, b) Double-layer capacitance ( $C_{dl}$ ) of Ni/Mn-N-C catalyst. c) Cyclic voltammograms of the Ni-N-C catalyst at different scan rates, d) Double-layer capacitance ( $C_{dl}$ ) of Ni-N-C catalyst. e) Cyclic voltammograms of the Mn-N-C catalyst at different scan rates, (f) Double-layer capacitance ( $C_{dl}$ ) of Mn-N-C catalyst.

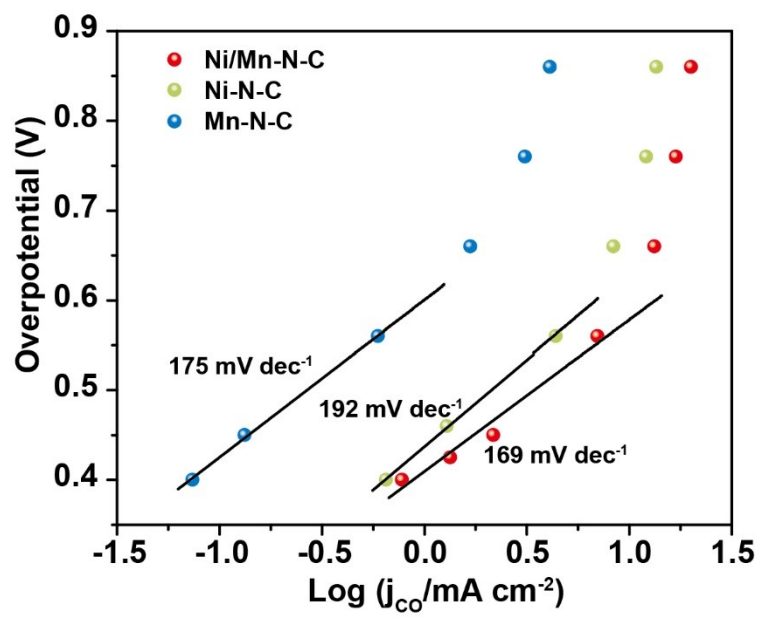

Figure S16. Tafel plots of the as-prepared samples.

## Supporting Table

Table S1. Elemental contents calculated from ICP-AES results.

| Sample    | Ni/ICP-AES (wt%) | Mn/ICP-AES (wt%) |
|-----------|------------------|------------------|
| Ni/Mn-N-C | 3.14             | 2.68             |
| Ni-N-C    | 6.83             | -                |
| Mn-N-C    | -                | 5.50             |

Table S2. Comparison of other Ni SACs for the electrochemical conversion of CO<sub>2</sub> to CO.

| Catalyst                                          | Potential<br>(V vs. RHE) | FE <sub>CO</sub><br>(%) | <i>j</i> <sub>CO</sub><br>(mA cm <sup>-2</sup> ) | Electrolyte             |
|---------------------------------------------------|--------------------------|-------------------------|--------------------------------------------------|-------------------------|
| Ni/Mn-N-C                                         | -0.76                    | 96.6                    | 13.3                                             | 0.5 M KHCO <sub>3</sub> |
| Ni-NG <sup>1</sup>                                | -0.62                    | 95                      | 11                                               | 0.5 M KHCO <sub>3</sub> |
| Ni-N <sub>x</sub> -C <sup>2</sup>                 | -0.7                     | 85                      | 9.5                                              | 0.1 M KHCO <sub>3</sub> |
| NiN-GS <sup>3</sup>                               | -0.82                    | 93.2                    | 4                                                | 0.1 M KHCO <sub>3</sub> |
| Ni-N <sub>4</sub> /C-NH <sub>2</sub> <sup>4</sup> | -0.7                     | 96                      | 63.6                                             | 0.5 M KHCO <sub>3</sub> |
| Ni-N <sub>3</sub> -V <sup>5</sup>                 | -0.9                     | 95                      | 62.5                                             | 0.5 M KHCO <sub>3</sub> |
| NiSA-N-CNTs <sup>6</sup>                          | -0.7                     | 90                      | 31.5                                             | 0.5 M KHCO <sub>3</sub> |
| N <sup>2+</sup> @NG <sup>7</sup>                  | -0.68                    | 92                      | 9.4                                              | 0.5 M KHCO <sub>3</sub> |
| Ni-NG-900 <sup>8</sup>                            | -1.0                     | 94                      | 59.6                                             | 0.5 M KHCO <sub>3</sub> |
| NC-CNTs (Ni) <sup>9</sup>                         | -1.0                     | 90                      | 8.1                                              | 0.1 M KHCO <sub>3</sub> |

## Reference:

1. K. Jiang, S. Siahrostami, T. Zheng, Y. Hu, S. Hwang, E. Stavitski, Y. Peng, J. Dynes, M. Gangisetty, D. Su, K. Attenkofer and H. Wang, *Energy Environ. Sci.*, 2018, **11**, 893-903.
2. W. Ju, A. Bagger, G.-P. Hao, A. S. Varela, I. Sinev, V. Bon, B. Roldan Cuenya, S. Kaskel, J. Rossmeisl and P. Strasser, *Nat. Commun.*, 2017, **8**, 944.
3. K. Jiang, S. Siahrostami, A. J. Akey, Y. Li, Z. Lu, J. Lattimer, Y. Hu, C. Stokes, M. Gangishetty, G. Chen, Y. Zhou, W. Hill, W.-B. Cai, D. Bell, K. Chan, J. K. Nørskov, Y. Cui and H. Wang, *Chem*, 2017, **3**, 950-960.
4. Z. Chen, X. Zhang, W. Liu, M. Jiao, K. Mou, X. Zhang and L. Liu, *Energy Environ. Sci.*, 2021, **14**, 2349-2356.
5. X. Rong, H.-J. Wang, X.-L. Lu, R. Si and T.-B. Lu, *Angew. Chem. Int. Ed.*, 2020, **59**, 1961-1965.
6. Y. Cheng, S. Zhao, B. Johannessen, J.-P. Veder, M. Saunders, M. R. Rowles, M. Cheng, C. Liu, M. F. Chisholm, R. De Marco, H.-M. Cheng, S.-Z. Yang and S. P. Jiang, *Adv. Mater.*, 2018, **30**, 1706287.
7. W. Bi, X. Li, R. You, M. Chen, R. Yuan, W. Huang, X. Wu, W. Chu, C. Wu and Y. Xie, *Adv. Mater.*, 2018, **30**, 1706617.
8. R. Boppella, M. Austeria P, Y. Kim, E. Kim, I. Song, Y. Eom, D. P. Kumar, M. Balamurugan, E. Sim, D. H. Kim and T. K. Kim, *Adv. Funct. Mater.*, 2022, **32**, 2202351.
9. Q. Fan, P. Hou, C. Choi, T.-S. Wu, S. Hong, F. Li, Y.-L. Soo, P. Kang, Y. Jung and Z. Sun, *Adv. Energy Mater.*, 2020, **10**, 1903068.
